# Supplementary material for: Changes in Microbial Community Structure in Response to Gummosis in Peach Tree Bark
Source: MDPI journal article supplement (doi:10.3390/plants11212834), 2022-10-25
Supplement: s1 [file s1]

## Supplementary materials

### Changes in microbial community structure in response to gummosis in peach tree bark

YoungJae Jo <sup>1</sup>, Da-Ryung Jung <sup>1</sup>, Tae-Hyung Park <sup>2</sup>, Dokyung Lee <sup>2</sup>, Min-Kyu Park <sup>1</sup>,  
Kyeongmo Lim <sup>1</sup> and Jae-Ho Shin <sup>1,2,3,\*</sup>

<sup>1</sup> Department of Applied Biosciences, Kyungpook National University, Daegu 41566, Republic of Korea

<sup>2</sup> Department of Integrative Biotechnology, Kyungpook National University, Daegu 41566, Republic of Korea

<sup>3</sup> NGS Core Facility, Kyungpook National University, Daehak-ro 80, Daegu 41566, Republic of Korea

\* Correspondence: jhshin@knu.ac.kr; Tel.: +82-53-950-5716; Fax: +82-53-953-7233

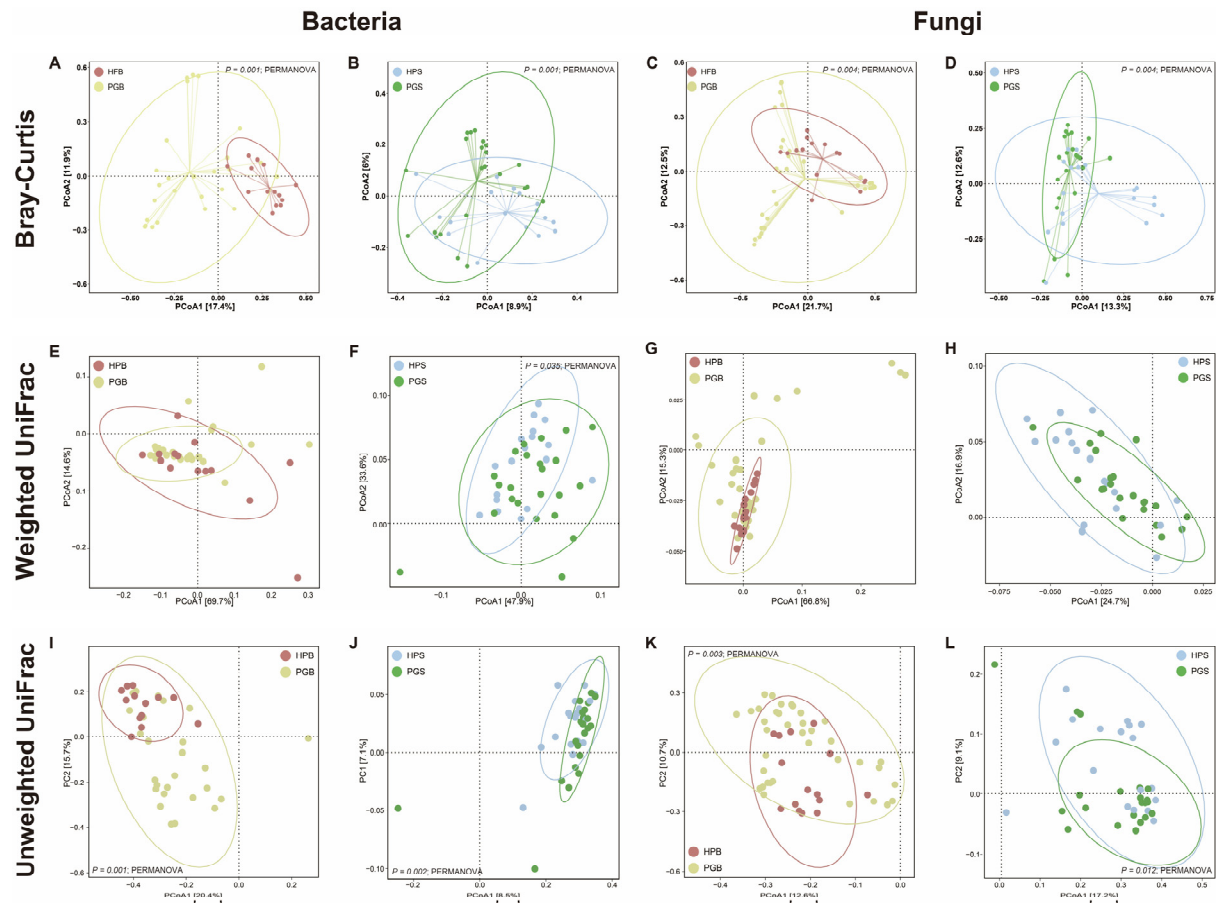

**Figure S1.** Microbial dissimilarity within bark and soil according to gummosis. All dissimilarity was computed using three strategies including Bray-Curtis (A-D), weighted UniFrac (E-H) and unweighted UniFrac (I-L). Each Permanova values were displayed in the individual plots.

**Table S1.** Microbial composition (%) of HPB, PGB, HPS, PGS, at phylum and family level.**Bacteria**

| Phylum            | HPB | PGB | HPS | PGS |
|-------------------|-----|-----|-----|-----|
| Acidobacteriota   | 2   | 3   | 12  | 16  |
| Actionobacteriota | 22  | 14  | 8   | 12  |
| Crenarchaeota     | 2   | 3   | 10  | 7   |
| Firmicutes        | 28  | 19  | 6   | 6   |
| Proteobacteria    | 40  | 56  | 32  | 34  |
| Other             | 6   | 5   | 24  | 25  |

**Fungi**

| Phylum            | HPB | PGB | HPS | PGS |
|-------------------|-----|-----|-----|-----|
| Ascomycota        | 98  | 86  | 81  | 85  |
| Basidiomycota     | 1   | 13  | 15  | 10  |
| Kingdom_Fungi     | 1   | 1   | 2   | 2   |
| Mortierellomycota | 0   | 0   | 2   | 2   |
| Other             | 0   | 0   | 0   | 1   |

**Bacteria**

| Family               | HPB | PGB | HPS | PGS |
|----------------------|-----|-----|-----|-----|
| Beijerinckiaceae     | 1   | 15  | 1   | 2   |
| Chitinophagaceae     | 0   | 0   | 4   | 6   |
| Nitrososphaeraceae   | 2   | 3   | 10  | 7   |
| Other                | 39  | 47  | 69  | 70  |
| Paenibacillaceae     | 9   | 7   | 1   | 1   |
| Propionibacteriaceae | 16  | 5   | 0   | 0   |
| Pseudomonadaceae     | 1   | 11  | 0   | 0   |
| Rhodobacteraceae     | 30  | 3   | 0   | 0   |
| Sphingomonadaceae    | 0   | 8   | 3   | 4   |
| uncultured           | 1   | 0   | 6   | 5   |
| Vicinamibacteraceae  | 1   | 0   | 6   | 5   |

**Fungi**

| Family             | HPB | PGB | HPS | PGS |
|--------------------|-----|-----|-----|-----|
| Chaetomiaceae      | 23  | 4   | 8   | 12  |
| Cladosporiaceae    | 5   | 5   | 3   | 4   |
| Helotiaceae        | 3   | 7   | 2   | 3   |
| Nectriaceae        | 12  | 12  | 21  | 26  |
| Order_Microascales | 2   | 0   | 5   | 3   |
| Order_Onygenales   | 5   | 4   | 0   | 0   |
| Other              | 44  | 46  | 53  | 44  |
| Phylum_Ascomycota  | 5   | 7   | 2   | 1   |
| Pseudeurotiaceae   | 2   | 2   | 5   | 6   |
| Valsaceae          | 0   | 13  | 0   | 0   |

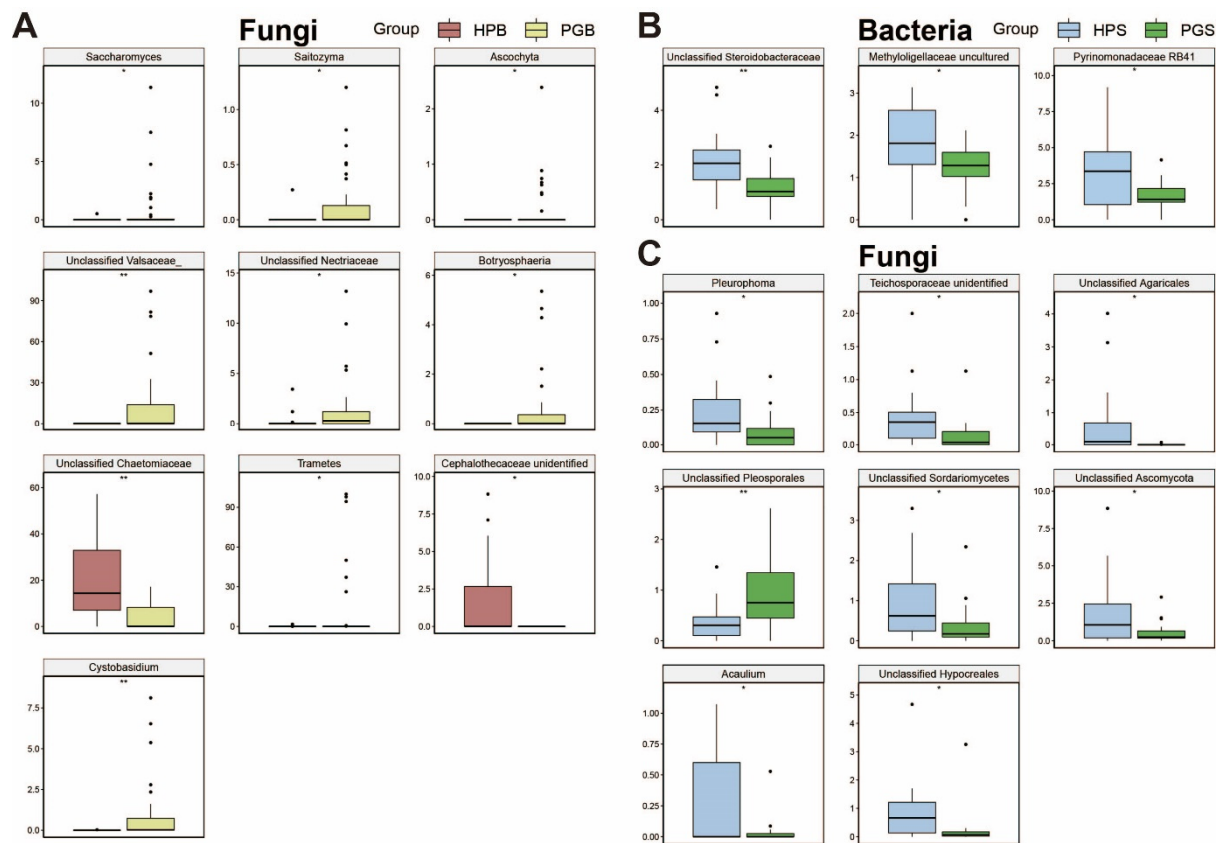

**Figure S2.** Genera with statistical difference between HP and PG. (A) Fungal genera between HFB and PGB. (B) and (C) Bacterial and fungal genera between HPS and PGS, respectively. All displayed genera show less than 10% of prevalence and 1% relative abundance in each groups. Percent (%) was adopted for the unit of bacterial concentration. Mann-Whitney U test was applied to assess statistical significance. \*  $p < 0.05$ , \*\*  $p < 0.01$ .

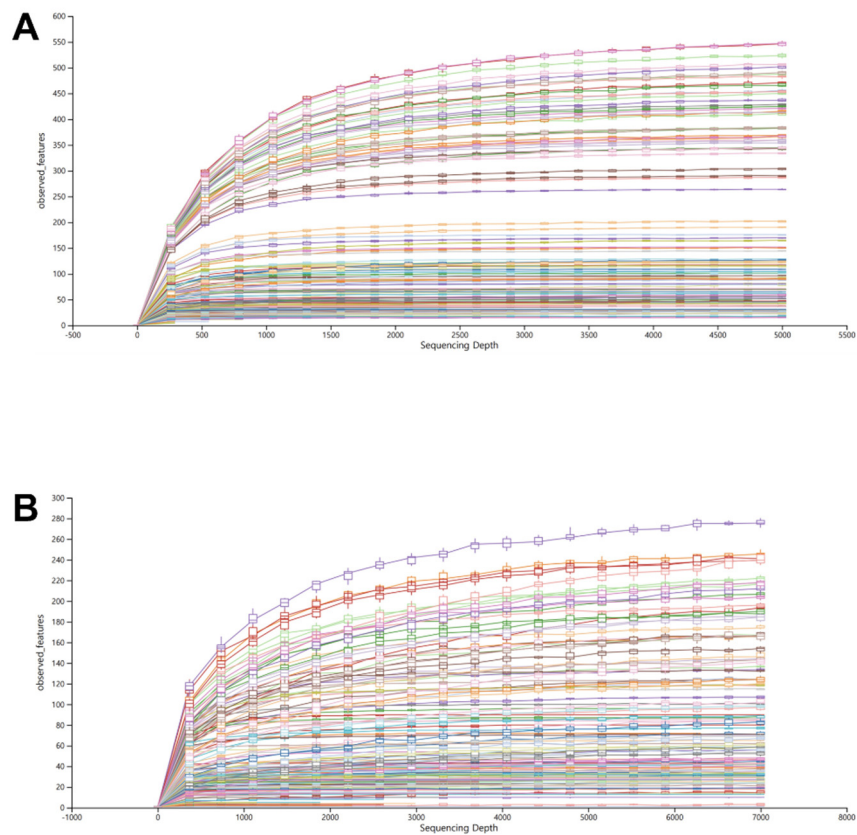

**Figure S3.** Rarefaction curves of Illumina MiSeq sequencing. (A) Rarefaction curve of bacterial sequencing with 5000 of sequencing depth (B) Rarefaction curve of fungal sequencing with 7000 of sequencing depth.
